# Supplementary material for: Ketamine/propofol admixture (ketofol) at induction in the critically ill against etomidate (KEEP PACE trial): study protocol for a randomized controlled trial
Source: PubMed Central journal article supplement (PMC4409710; doi:10.1186/s13063-015-0687-0), 2015-04-21
Supplement: 13063_2015_687_MOESM2_ESM.pdf [file 13063_2015_687_MOESM2_ESM.pdf]

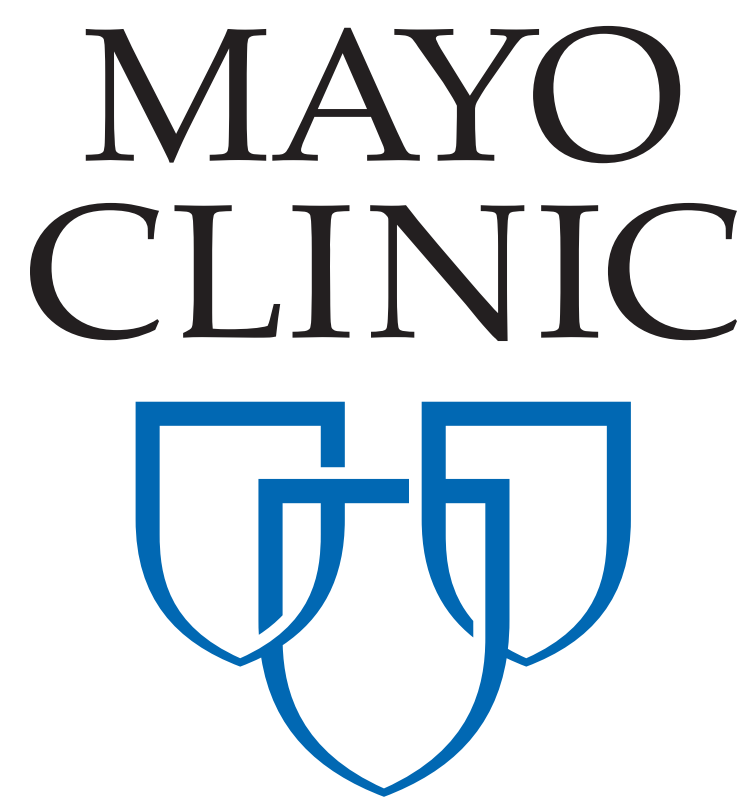

# KEEP PACE Trial

*Ketamine + Propofol vs. Etomidate for intubations in the ICU*

Usual ICU Care

Decision to Intubate

Community level notification process in lieu of standard informed consent  
If time allows, consent may be obtained from the patient or Legally Authorized Representative (LAR) after intubation

Randomization on shock status (MAP  $\geq$ 65 or <65)

**Ketofol group**  
(See dose card)  
**+ Fentanyl 50 mcg IV**

**Etomidate group**  
(See dose card)  
**+ Fentanyl 50 mcg IV**

**Exclusions (ANY):**

- HR >160 or <50
- SBP >160 or <70
- DBP >100 or <30
- Opiate dependence
- Intracranial lesion
- Pregnancy (see left)
- Code situation
- Continuous Sedative IV infusion in the last 24 hours (Prop/Precedex/Ativan/Midaz/Fent)
- Bipolar/schizophrenia
- Wt >140Kg or <30kg or unknown.
- Egg allergy

**If female:**

Age 18-50 yo AND no documented (-) pregnancy test for current illness OR no documented surgical sterility.

| Ketofol<br>(Ketamine and Propofol)                           |                                                                                                            |
|--------------------------------------------------------------|------------------------------------------------------------------------------------------------------------|
| Ketamine Dose: 0.5 mg/kg<br>Propofol Dose: 0.5 mg/kg         |                                                                                                            |
| Patient weight (kg)                                          | Dose Volume                                                                                                |
| Round up to nearest weight increment (example 63 kg = 66 kg) | (Place 20 mL of Ketamine 10 mg/mL and 20 mL of Propofol 10 mg/mL into 60 mL syringe Total volume of 40 mL) |
| 30                                                           | 3 mL                                                                                                       |
| 34                                                           | 3 mL                                                                                                       |
| 38                                                           | 4 mL                                                                                                       |
| 42                                                           | 4 mL                                                                                                       |
| 46                                                           | 5 mL                                                                                                       |
| 50                                                           | 5 mL                                                                                                       |
| 54                                                           | 5 mL                                                                                                       |
| 58                                                           | 6 mL                                                                                                       |
| 62                                                           | 6 mL                                                                                                       |
| 66                                                           | 7 mL                                                                                                       |
| 70                                                           | 7 mL                                                                                                       |
| 74                                                           | 7 mL                                                                                                       |
| 78                                                           | 8 mL                                                                                                       |
| 82                                                           | 8 mL                                                                                                       |
| 86                                                           | 9 mL                                                                                                       |
| 90                                                           | 9 mL                                                                                                       |
| 94                                                           | 9 mL                                                                                                       |
| 98                                                           | 10 mL                                                                                                      |
| 102                                                          | 10 mL                                                                                                      |
| 106                                                          | 11 mL                                                                                                      |
| 110                                                          | 11 mL                                                                                                      |
| 114                                                          | 11 mL                                                                                                      |
| 118                                                          | 12 mL                                                                                                      |
| 122                                                          | 12 mL                                                                                                      |
| 126                                                          | 13 mL                                                                                                      |
| 130                                                          | 13 mL                                                                                                      |
| 134                                                          | 13 mL                                                                                                      |
| 138                                                          | 14 mL                                                                                                      |
| 142                                                          | 14 mL                                                                                                      |

| Etomidate                                                    |                                                       |
|--------------------------------------------------------------|-------------------------------------------------------|
| Etomidate Dose: 0.15 mg/kg                                   |                                                       |
| Patient weight (kg)                                          | Dose Volume                                           |
| Round up to nearest weight increment (example 63 kg = 66 kg) | (Place 20 mL of Etomidate 2 mg/mL into 35 mL syringe) |
| 30                                                           | 2 mL                                                  |
| 34                                                           | 3 mL                                                  |
| 38                                                           | 3 mL                                                  |
| 42                                                           | 3 mL                                                  |
| 46                                                           | 3 mL                                                  |
| 50                                                           | 4 mL                                                  |
| 54                                                           | 4 mL                                                  |
| 58                                                           | 4 mL                                                  |
| 62                                                           | 5 mL                                                  |
| 66                                                           | 5 mL                                                  |
| 70                                                           | 5 mL                                                  |
| 74                                                           | 6 mL                                                  |
| 78                                                           | 6 mL                                                  |
| 82                                                           | 6 mL                                                  |
| 86                                                           | 6 mL                                                  |
| 90                                                           | 7 mL                                                  |
| 94                                                           | 7 mL                                                  |
| 98                                                           | 7 mL                                                  |
| 102                                                          | 8 mL                                                  |
| 106                                                          | 8 mL                                                  |
| 110                                                          | 8 mL                                                  |
| 114                                                          | 9 mL                                                  |
| 118                                                          | 9 mL                                                  |
| 122                                                          | 9 mL                                                  |
| 126                                                          | 9 mL                                                  |
| 130                                                          | 10 mL                                                 |
| 134                                                          | 10 mL                                                 |
| 138                                                          | 10 mL                                                 |
| 142                                                          | 11 mL                                                 |

- One additional “rescue dose” of the induction agent may be used
- Paralytics, benzodiazepines, additional doses of fentanyl may be used
- Anti-cholinergics, vasoactive medications and steroids may be used
- Vital signs to be checked q1min initially, then q5min as per protocol

Principal Investigator:

Nathan Smischney, MD, pager 35238 | Units: MB6 B/G & MB7 D/E only  
Study Coordinator Richard Hinds, RRT, pager 46077
