# Supplementary material for: Ketamine/propofol admixture (ketofol) at induction in the critically ill against etomidate (KEEP PACE trial): study protocol for a randomized controlled trial
Source: PubMed Central journal article supplement (PMC4409710; doi:10.1186/s13063-015-0687-0), 2015-04-21
Supplement: 13063_2015_687_MOESM3_ESM.pdf [file 13063_2015_687_MOESM3_ESM.pdf]

# KEEP PACE Dose Chart

## IRB # 13-000506

| Etomidate                                                                                          |                                                                            |              | Ketofol<br>(Ketamine and Propofol)                                                                 |                                                                                                                                          |           |          |
|----------------------------------------------------------------------------------------------------|----------------------------------------------------------------------------|--------------|----------------------------------------------------------------------------------------------------|------------------------------------------------------------------------------------------------------------------------------------------|-----------|----------|
| Etomidate Dose: 0.15 mg/kg                                                                         |                                                                            |              | Ketamine Dose: 0.5 mg/kg<br>Propofol Dose: 0.5 mg/kg                                               |                                                                                                                                          |           |          |
| Patient weight<br>(kg)<br>Round up to<br>nearest<br>weight increment<br>(example 63 kg =<br>66 kg) | Dose Volume<br>(Place<br>20 mL of Etomidate 2 mg/mL<br>into 35 mL syringe) | Dose<br>(mg) | Patient weight<br>(kg)<br>Round up to<br>nearest<br>weight increment<br>(example 63 kg =<br>66 kg) | Dose Volume<br>(Place<br>20 mL of Ketamine 10 mg/mL<br>and<br>20 mL of Propofol 10 mg/mL<br>into 60 mL syringe<br>Total volume of 40 mL) | Dose (mg) |          |
|                                                                                                    |                                                                            |              |                                                                                                    |                                                                                                                                          | Ketamine  | Propofol |
| 30                                                                                                 | 2 mL                                                                       | 4 mg         | 30                                                                                                 | 3 mL                                                                                                                                     | 15 mg     | 15 mg    |
| 34                                                                                                 | 3 mL                                                                       | 6 mg         | 34                                                                                                 | 3 mL                                                                                                                                     | 15 mg     | 15 mg    |
| 38                                                                                                 | 3 mL                                                                       | 6 mg         | 38                                                                                                 | 4 mL                                                                                                                                     | 20 mg     | 20 mg    |
| 42                                                                                                 | 3 mL                                                                       | 6 mg         | 42                                                                                                 | 4 mL                                                                                                                                     | 20 mg     | 20 mg    |
| 46                                                                                                 | 3 mL                                                                       | 6 mg         | 46                                                                                                 | 5 mL                                                                                                                                     | 25 mg     | 25 mg    |
| 50                                                                                                 | 4 mL                                                                       | 8 mg         | 50                                                                                                 | 5 mL                                                                                                                                     | 25 mg     | 25 mg    |
| 54                                                                                                 | 4 mL                                                                       | 8 mg         | 54                                                                                                 | 5 mL                                                                                                                                     | 25 mg     | 25 mg    |
| 58                                                                                                 | 4 mL                                                                       | 8 mg         | 58                                                                                                 | 6 mL                                                                                                                                     | 30 mg     | 30 mg    |
| 62                                                                                                 | 5 mL                                                                       | 10 mg        | 62                                                                                                 | 6 mL                                                                                                                                     | 30 mg     | 30 mg    |
| 66                                                                                                 | 5 mL                                                                       | 10 mg        | 66                                                                                                 | 7 mL                                                                                                                                     | 35 mg     | 35 mg    |
| 70                                                                                                 | 5 mL                                                                       | 10 mg        | 70                                                                                                 | 7 mL                                                                                                                                     | 35 mg     | 35 mg    |
| 74                                                                                                 | 6 mL                                                                       | 12 mg        | 74                                                                                                 | 7 mL                                                                                                                                     | 35 mg     | 35 mg    |
| 78                                                                                                 | 6 mL                                                                       | 12 mg        | 78                                                                                                 | 8 mL                                                                                                                                     | 40 mg     | 40 mg    |
| 82                                                                                                 | 6 mL                                                                       | 12 mg        | 82                                                                                                 | 8 mL                                                                                                                                     | 40 mg     | 40 mg    |
| 86                                                                                                 | 6 mL                                                                       | 12 mg        | 86                                                                                                 | 9 mL                                                                                                                                     | 45 mg     | 45 mg    |
| 90                                                                                                 | 7 mL                                                                       | 14 mg        | 90                                                                                                 | 9 mL                                                                                                                                     | 45 mg     | 45 mg    |
| 94                                                                                                 | 7 mL                                                                       | 14 mg        | 94                                                                                                 | 9 mL                                                                                                                                     | 45 mg     | 45 mg    |
| 98                                                                                                 | 7 mL                                                                       | 14 mg        | 98                                                                                                 | 10 mL                                                                                                                                    | 50 mg     | 50 mg    |
| 102                                                                                                | 8 mL                                                                       | 16 mg        | 102                                                                                                | 10 mL                                                                                                                                    | 50 mg     | 50 mg    |
| 106                                                                                                | 8 mL                                                                       | 16 mg        | 106                                                                                                | 11 mL                                                                                                                                    | 55 mg     | 55 mg    |
| 110                                                                                                | 8 mL                                                                       | 16 mg        | 110                                                                                                | 11 mL                                                                                                                                    | 55 mg     | 55 mg    |
| 114                                                                                                | 9 mL                                                                       | 18 mg        | 114                                                                                                | 11 mL                                                                                                                                    | 55 mg     | 55 mg    |
| 118                                                                                                | 9 mL                                                                       | 18 mg        | 118                                                                                                | 12 mL                                                                                                                                    | 60 mg     | 60 mg    |
| 122                                                                                                | 9 mL                                                                       | 18 mg        | 122                                                                                                | 12 mL                                                                                                                                    | 60 mg     | 60 mg    |
| 126                                                                                                | 9 mL                                                                       | 18 mg        | 126                                                                                                | 13 mL                                                                                                                                    | 65 mg     | 65 mg    |
| 130                                                                                                | 10 mL                                                                      | 20 mg        | 130                                                                                                | 13 mL                                                                                                                                    | 65 mg     | 65 mg    |
| 134                                                                                                | 10 mL                                                                      | 20 mg        | 134                                                                                                | 13 mL                                                                                                                                    | 65 mg     | 65 mg    |
| 138                                                                                                | 10 mL                                                                      | 20 mg        | 138                                                                                                | 14 mL                                                                                                                                    | 70 mg     | 70 mg    |
| 142                                                                                                | 11 mL                                                                      | 22 mg        | 142                                                                                                | 14 mL                                                                                                                                    | 70 mg     | 70 mg    |
